# Supplementary material for: A simple method for the preparation of a nickel selenide and cobalt selenide mixed catalyst to enhance bifunctional oxygen activity for Zn–air batteries
Source: Royal Society of Chemistry journal article supplement (doi:10.1039/d1ra02861h), 2021-01-01
Supplement: d1ra02861h1.pdf [file d1ra02861h1.pdf]

## Supporting Information

### **A simple method for the preparation of nickel selenide and cobalt selenide mixed catalyst to enhance bifunctional oxygen activity for Zn-air battery**

Li-Juan Peng,<sup>ab</sup> Jie-Ping Huang,<sup>a</sup> Qiu-Ren Pan,<sup>a</sup> Ying Liang,<sup>a</sup> Na Yin,<sup>a</sup> Hang-Chang Xu,<sup>a</sup>

Nan Li<sup>\*a</sup>

<sup>a</sup>School of Chemistry and Chemical Engineering/Guangzhou Key Laboratory for Clean Energy and Materials, Guangzhou University, Guangzhou 510006, China.

<sup>b</sup>School of Chemistry and Materials Science, Jinan University, Guangzhou 510632, China.

\*Corresponding author: E-mail: [nanli@gzhu.edu.cn](mailto:nanli@gzhu.edu.cn)

†Electronic supplementary information (ESI) available. See DOI: 10.1039/x0xx00000x

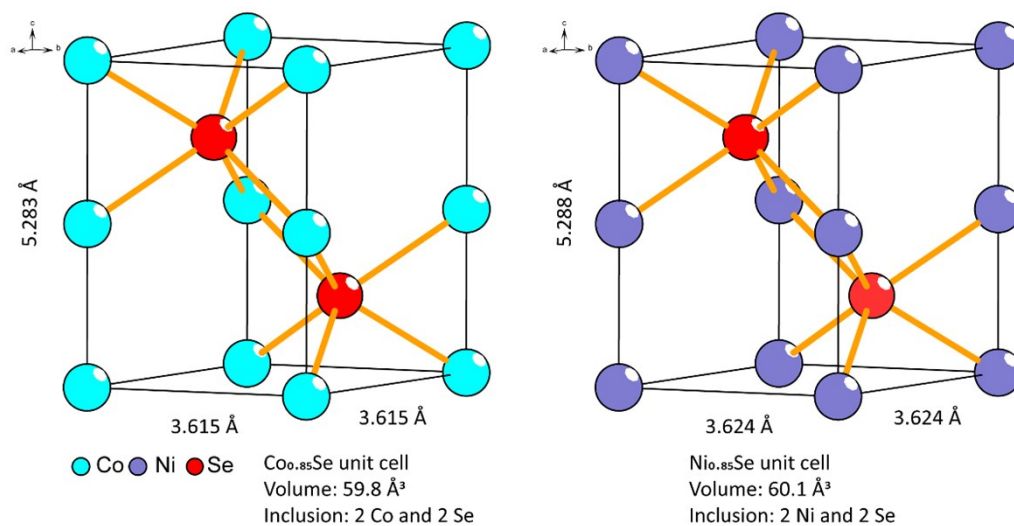

**Fig. S1** The unit cell of  $\text{Ni}_{0.85}\text{Se}$  and  $\text{Co}_{0.85}\text{Se}$

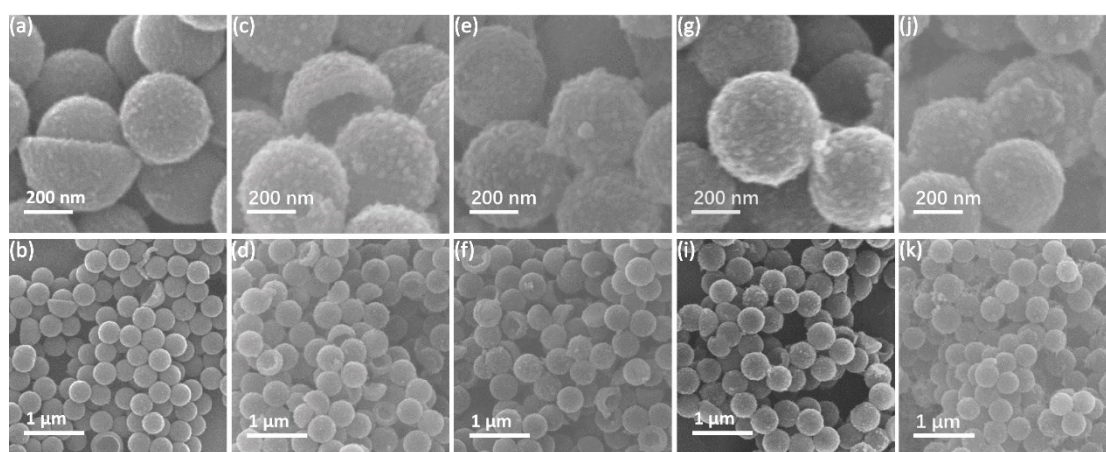

**Fig. S2** SEM of (a, b) NHCS, (c, d)  $\text{Ni}_{0.85}\text{Se}$ -NHCS, (e, f)  $\text{Co}_{0.85}\text{Se}$ -NHCS, (g, i)  $\text{Ni}_{0.85}\text{Se}/\text{Co}_{0.85}\text{Se}$ -NHCS-2, and (j, k) 50% Ni- $\text{Co}_{0.85}\text{Se}$ -NHCS

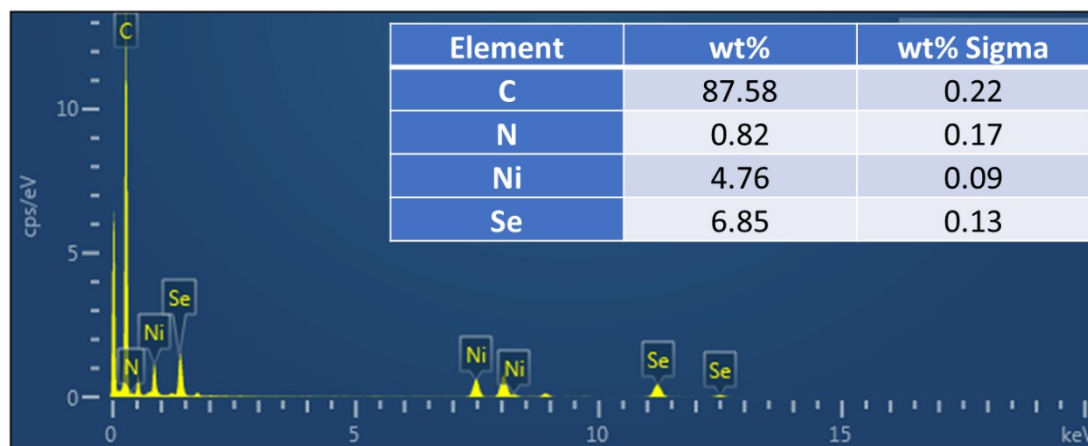

**Fig. S3** EDX of  $\text{Ni}_{0.85}\text{Se}$ -NHCS and corresponding element content

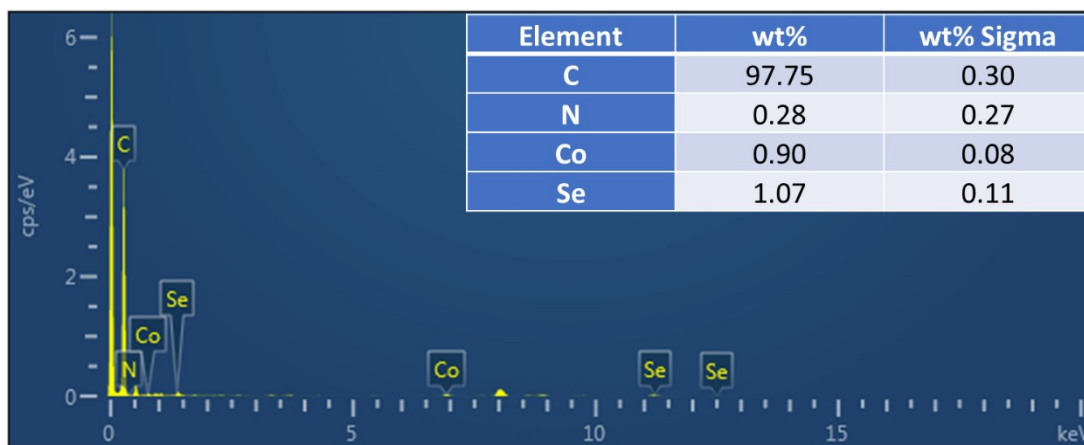

Fig. S4 EDX of  $\text{Co}_{0.85}\text{Se}$ -NHCS and corresponding element content

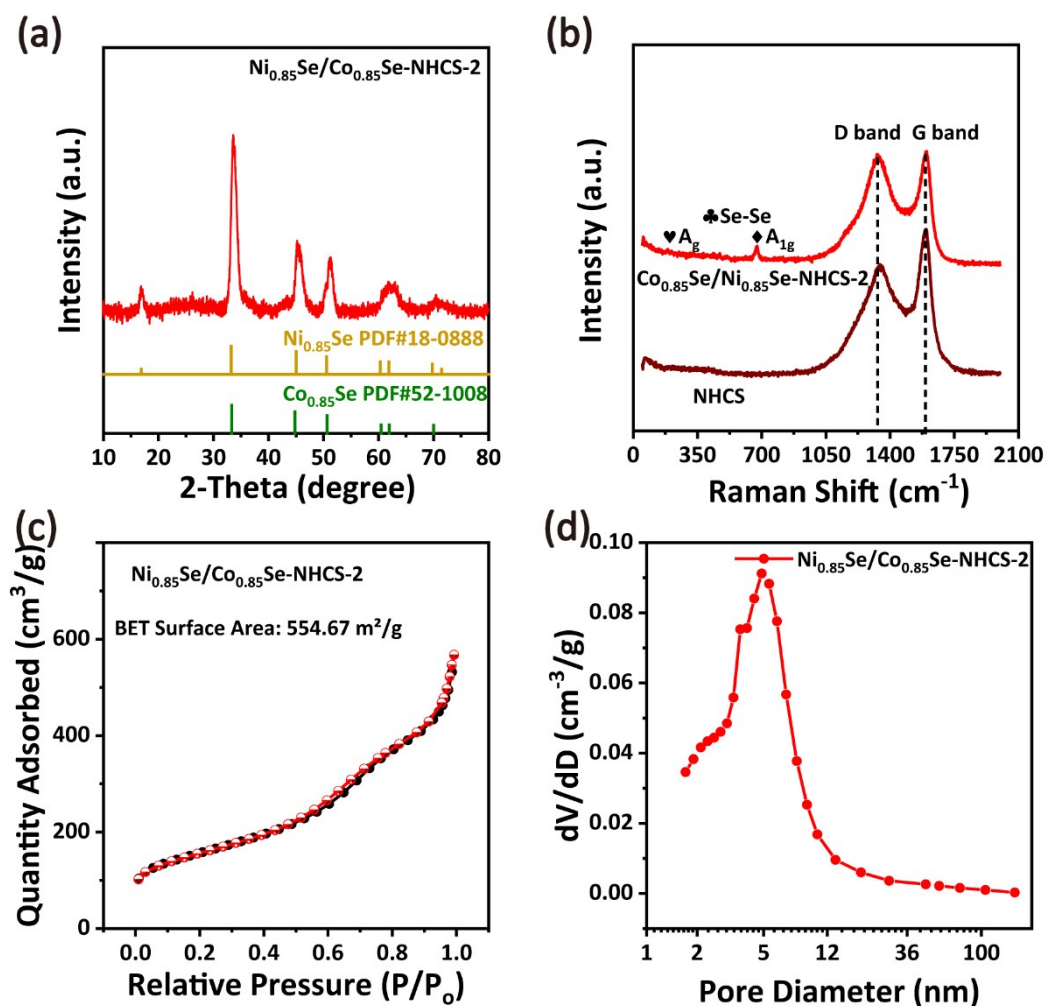

Fig. S5 (a) the XRD patterns of  $\text{Ni}_{0.85}\text{Se}/\text{Co}_{0.85}\text{Se}$ -NHCS-2 and (b) Raman patterns of  $\text{Ni}_{0.85}\text{Se}/\text{Co}_{0.85}\text{Se}$ -NHCS-2 and NHCS, (c)  $\text{N}_2$  adsorption/desorption isotherms and (d) corresponding pore size distributions curves of  $\text{Ni}_{0.85}\text{Se}/\text{Co}_{0.85}\text{Se}$ -NHCS-2.

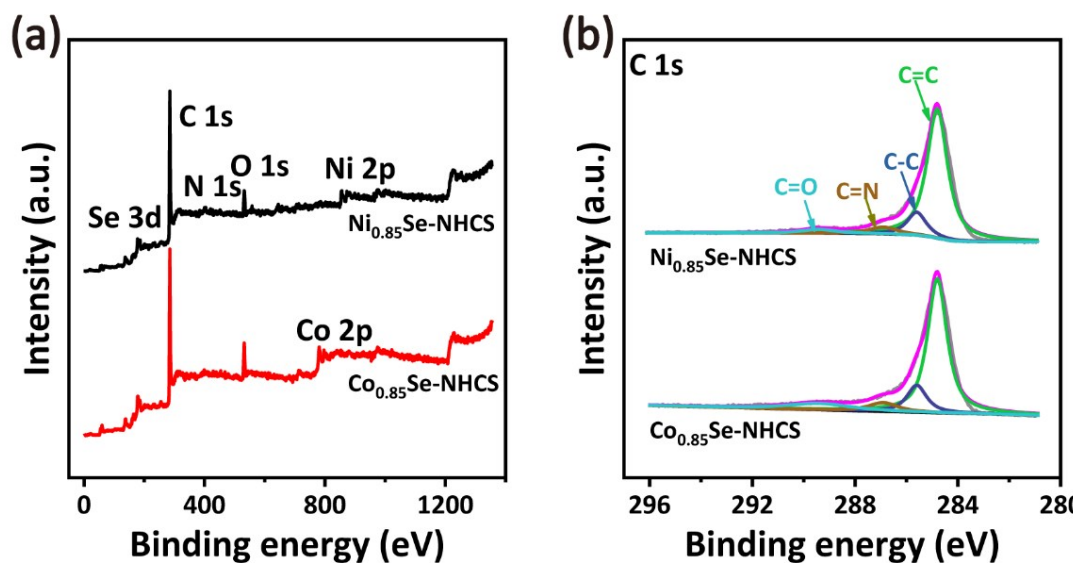

Fig. S6 X-ray photoelectron spectroscopy and corresponding C1s spectra

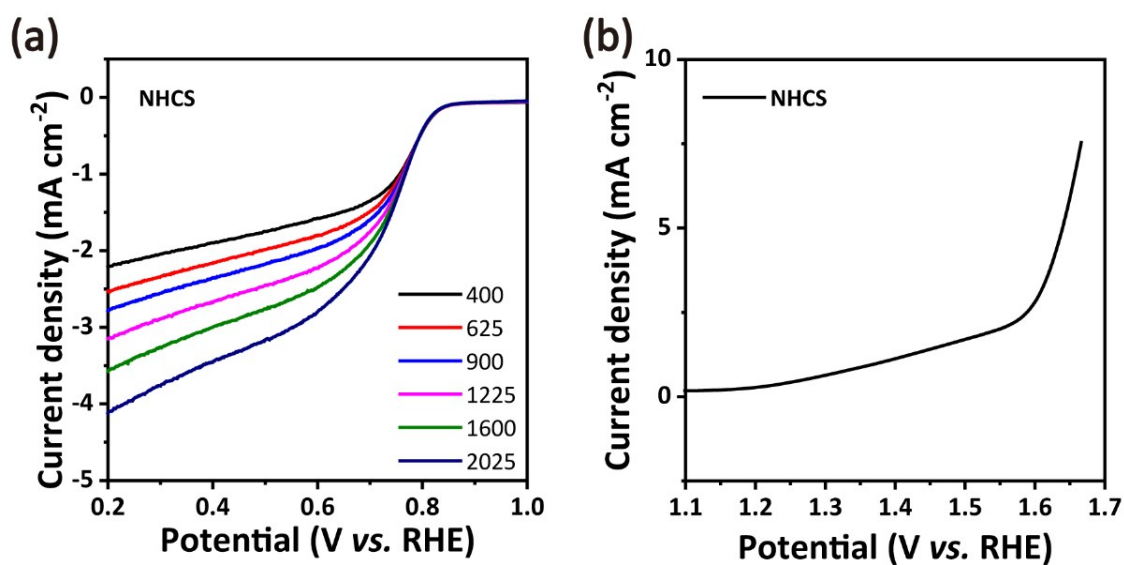

Fig. S7 LSV curves for ORR varying the 400 rpm to 2025 rpm and LSV curves for OER of NHCS.

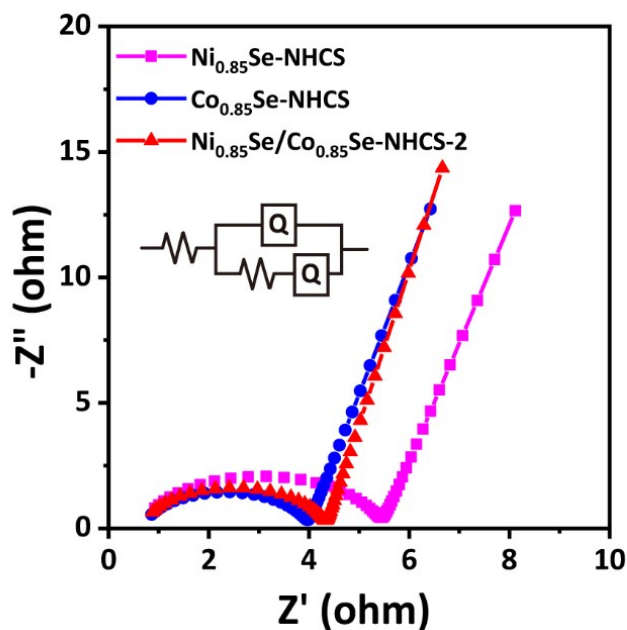

**Fig. S8** EIS spectra of  $\text{Ni}_{0.85}\text{Se-NHCS}$ ,  $\text{Co}_{0.85}\text{Se-NHCS}$ , and  $\text{Ni}_{0.85}\text{Se/Co}_{0.85}\text{Se-NHCS-2}$ .

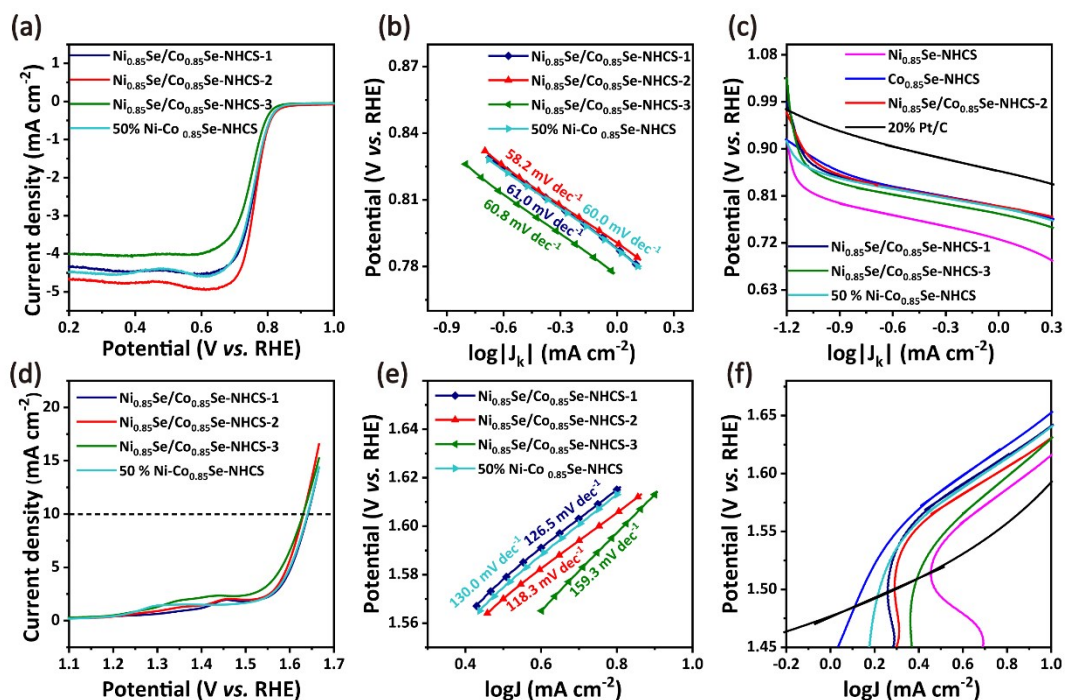

**Fig. S9** LSV curves for (a) ORR, corresponding (b, c) Tafel curves, LSV curves for (d) OER and corresponding (e, f) Tafel curves of the as-synthesized catalysts.

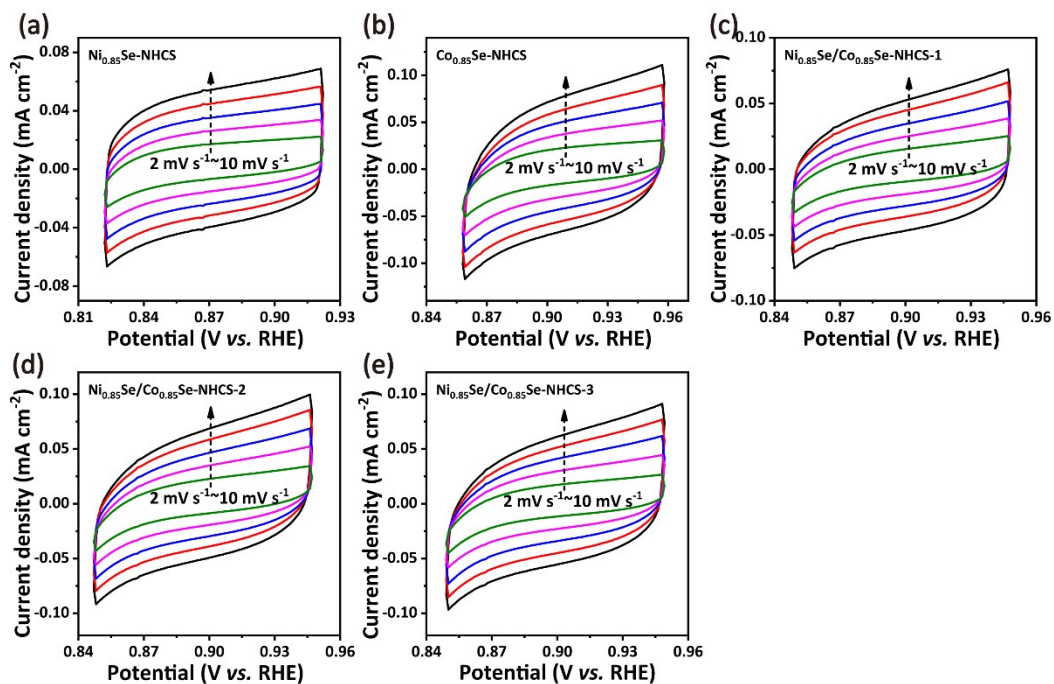

**Fig. S10** CV curves of (a)  $\text{Ni}_{0.85}\text{Se-NHCS}$ , (b)  $\text{Co}_{0.85}\text{Se-NHCS}$ , (c)  $\text{Ni}_{0.85}\text{Se/Co}_{0.85}\text{Se-NHCS-1}$ , (d)  $\text{Ni}_{0.85}\text{Se/Co}_{0.85}\text{Se-NHCS-2}$  and (e)  $\text{Ni}_{0.85}\text{Se/Co}_{0.85}\text{Se-NHCS-3}$  at different scan rates.

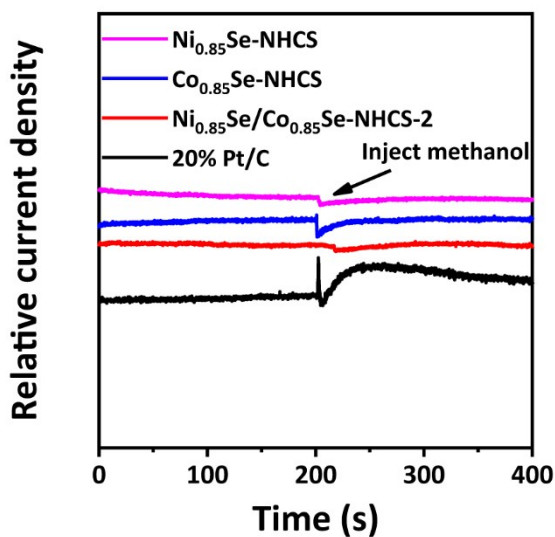

**Fig. S11** The methanol tolerance of  $\text{Ni}_{0.85}\text{Se/Co}_{0.85}\text{Se-NHCS-2}$  and 20 % Pt/C by the chronoamperometric test at 0.3 V vs. RHE in  $\text{O}_2$ -saturated 0.1 M KOH solution



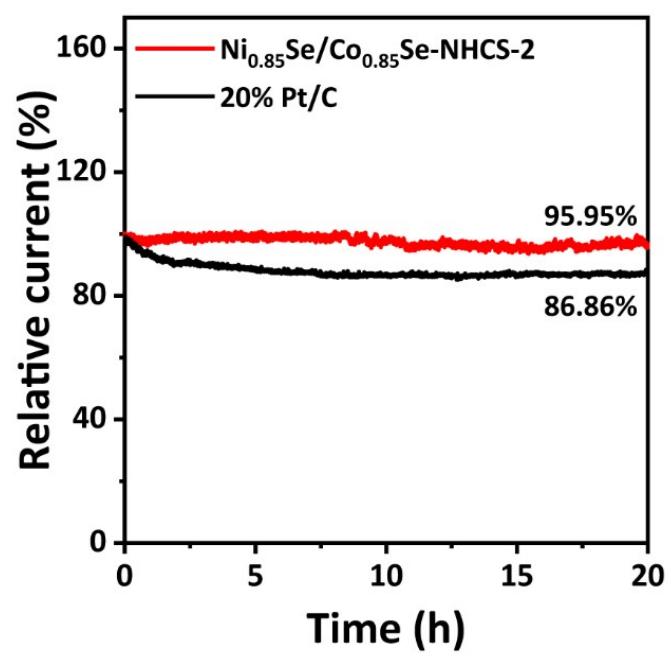

**Fig. S12** The chronoamperometric test of Ni<sub>0.85</sub>Se/Co<sub>0.85</sub>Se-NHCS-2 and 20 % Pt/C at 0.3 V vs. RHE in O<sub>2</sub>-saturated 0.1 M KOH solution

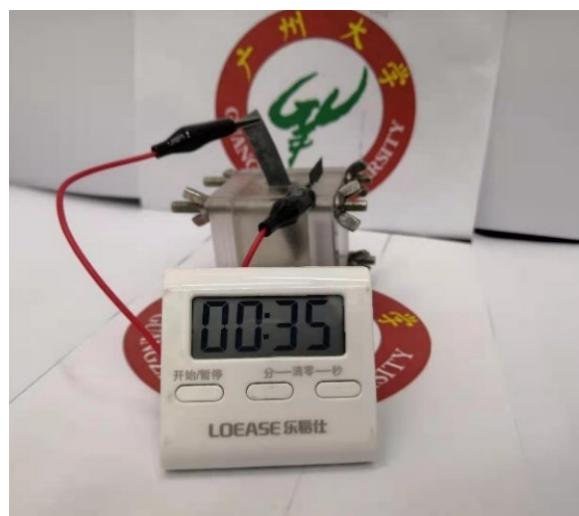

**Fig. S13** The photo of the zinc-air battery assembled with Ni<sub>0.85</sub>Se/Co<sub>0.85</sub>Se-NHCS-2 driving a timer.

**Table S1.** The bifunctional activity of as-synthesized catalysts for ORR and OER

|                                                    | $E_{\text{onset}}$ (V) | $E_{1/2}$ (V) | $J_{\text{limiting}}$ (mA cm <sup>-2</sup> ) | $E_{j=10}$ (V) | $\Delta E$ (V) |
|----------------------------------------------------|------------------------|---------------|----------------------------------------------|----------------|----------------|
| Ni <sub>0.85</sub> Se-NHCS                         | 0.79                   | 0.69          | 3.71                                         | 1.62           | 0.93           |
| Co <sub>0.85</sub> Se-NHCS                         | 0.89                   | 0.76          | 4.67                                         | 1.65           | 0.89           |
| Ni <sub>0.85</sub> Se/Co <sub>0.85</sub> Se-NHCS-1 | 0.84                   | 0.76          | 4.34                                         | 1.64           | 0.88           |
| Ni <sub>0.85</sub> Se/Co <sub>0.85</sub> Se-NHCS-2 | 0.90                   | 0.77          | 4.66                                         | 1.63           | 0.86           |
| Ni <sub>0.85</sub> Se/Co <sub>0.85</sub> Se-NHCS-3 | 0.86                   | 0.75          | 4.02                                         | 1.63           | 0.88           |
| 20 % Pt/C & RuO <sub>2</sub>                       | 0.94                   | 0.82          | 5.05                                         | 1.59           | 0.77           |



**Table S2.** Comparison with the bifunctional activity of different catalysts for ORR and OER

| catalyst                                            | Mass loading (mg cm <sup>-2</sup> ) | Electrolyte (mol L <sup>-1</sup> )   | ORR half-wave potential (V) | ORR Tafel slope (mV dec <sup>-1</sup> ) | OER potential at 10 mA cm <sup>-2</sup> (V) | OER Tafel slope (mV dec <sup>-1</sup> ) | Reference |
|-----------------------------------------------------|-------------------------------------|--------------------------------------|-----------------------------|-----------------------------------------|---------------------------------------------|-----------------------------------------|-----------|
| Ni <sub>0.85</sub> Se-NHCS                          | 0.12                                | 0.1 M KOH                            | 0.69                        | 71.7                                    | 1.62                                        | 141.6                                   | This work |
| Co <sub>0.85</sub> Se-NHCS                          | 0.12                                | 0.1 M KOH                            | 0.76                        | 62.7                                    | 1.65                                        | 136                                     | This work |
| Ni <sub>0.85</sub> Se/Co <sub>0.85</sub> Se-NHCS-2  | 0.12                                | 0.1 M KOH                            | 0.78                        | 58.2                                    | 1.63                                        | 118.3                                   | This work |
| Ni <sub>x</sub> Co <sub>0.85-x</sub> Se             | 0.60                                | 0.1 M KOH                            | 0.78                        | /                                       | 1.54                                        | 62                                      | 1         |
| Co <sub>0.85</sub> Se@NC                            | 0.40                                | 1 M KOH                              | /                           | /                                       | 1.55                                        | 75                                      | 2         |
| Co <sub>0.85</sub> Se@CNFs                          | 0.23                                | 0.1 M KOH                            | 0.82                        | 69                                      | 1.58                                        | 61                                      | 3         |
| coral-like CoSe                                     | 0.28                                | 0.1 M KOH                            | /                           | /                                       | 1.53                                        | 40                                      | 4         |
| Co <sub>0.7</sub> Fe <sub>0.3</sub> Se <sub>2</sub> | 0.51                                | 0.5 M H <sub>2</sub> SO <sub>4</sub> | 0.584                       | 110                                     | /                                           | /                                       | 5         |
| CoSe <sub>2</sub>                                   | 1                                   | 0.1 M KOH                            | /                           | /                                       | 1.74                                        | 67                                      | 6         |
| NiSe <sub>2</sub>                                   | 1                                   | 0.1 M KOH                            | /                           | /                                       | 1.64                                        | 50                                      | 6         |
| (Ni, Co)Se <sub>2</sub>                             | 0.17                                | 0.1 M KOH                            | 0.7                         | /                                       | 1.59                                        | 86                                      | 7         |
| NiCo <sub>2</sub> Se <sub>4</sub>                   | 0.39                                | 1 M KOH                              | 0.77                        | /                                       | 1.56                                        | 56                                      | 8         |

**Table S3.** Comparison with the performance of zinc-air batteries of nonprecious catalysts.

| Catalyst                                               | Open circuit potential (V) | Maximum power density (mW cm <sup>-2</sup> ) | Reference |
|--------------------------------------------------------|----------------------------|----------------------------------------------|-----------|
| Ni <sub>0.85</sub> Se/Co <sub>0.85</sub> Se-NHCS-2     | 1.40                       | 118.34                                       | This work |
| 20% Pt/C                                               | 1.46                       | 154.13                                       | This work |
| (Ni, Co)Se <sub>2</sub>                                | 1.38                       | 110                                          | 7         |
| IOSHs-NSC-Co <sub>9</sub> S <sub>8</sub>               | 1.49                       | 113                                          | 9         |
| N-CoS <sub>2</sub> YSSs                                | 1.41                       | 81                                           | 10        |
| Co/Co <sub>3</sub> O <sub>4</sub> @PGS                 | 1.45                       | 118.27                                       | 11        |
| Co/Co <sub>x</sub> M <sub>y</sub> (M=P, N)             | 1.43                       | 125.2                                        | 12        |
| Ni <sub>0.6</sub> Co <sub>0.4</sub> Se <sub>2</sub> -O | 1.41                       | 110                                          | 13        |
| O-Co <sub>1-x</sub> Mo <sub>x</sub> Se <sub>2</sub>    | 1.53                       | 120.28                                       | 14        |
| FeCo-N-C-700                                           | 1.39                       | 150                                          | 15        |
| Co-MOF-800                                             | 1.38                       | 144                                          | 16        |

## References

- 1 X. Zheng, J. Zhang, J. Wang, Z. Zhang, W. Hu and Y. Han, *Sci. China Mater.*, 2019, **63**, 347-355.
- 2 T. Meng, J. Qin, S. Wang, D. Zhao, B. Mao and M. Cao, *J. Mater. Chem. A*, 2017, **5**, 7001-7014.
- 3 L. Gui, Z. Huang, D. Ai, B. He, W. Zhou, J. Sun, J. Xu, Q. Wang and L. Zhao, *Chem. Eur. J.* 2020, **26**, 4063.
- 4 M. Liao, G. Zeng, T. Luo, Z. Jin, Y. Wang, X. Kou and D. Xiao, *Electrochim. Acta*, 2016, **194**, 59-66.
- 5 B. Yu, J. Jin, H. Wu, S. Wang, Q. Xia and H. Liu, *Int. J. Hydrog. Energy*, 2017, **42**,

236-242.

- 6 I. H. Kwak, H. S. Im, D. M. Jang, Y. W. Kim, K. Park, Y. R. Lim, E. H. Cha and J. Park, *ACS Appl. Mater. Interfaces*, 2016, **8**, 5327-5334.
- 7 C. Sun, X. Guo, J. Zhang, G. Han, D. Gao and X. Gao, *J. Energy Chem.*, 2019, **38**, 34-40.
- 8 H. Sancho, Y. Zhang, L. Liu, V. G. Baredia, S. Wu, Y. Zhang, P.-W. Huang, Y. Zhang, T.-H. Wu, W. You and N. Liu, *J. Electrochem. Soc.*, 2020, **167**, 056503.
- 9 K. Tang, C. Yuan, Y. Xiong, H. Hu and M. Wu, *Appl. Catal. B*, 2020, **260**, 118209
- 10 X. F. Lu, S. L. Zhang, E. Shanguan, P. Zhang, S. Gao and X. W. D. Lou, *Adv. sci.*, 2020, **7**, 2001178.
- 11 Y. Jiang, Y.-P. Deng, J. Fu, D. U. Lee, R. Liang, Z. P. Cano, Y. Liu, Z. Bai, S. Hwang, L. Yang, D. Su, W. Chu and Z. Chen, *Adv. Energy Mater.*, 2018, **8**, 1702900
- 12 J. Chen, C. Fan, X. Hu, C. Wang, Z. Huang, G. Fu, J. M. Lee and Y. Tang, *Small*, 2019, **15**, 1901518.
- 13 X. Zheng, Y. Cao, X. Zheng, M. Cai, J. Zhang, J. Wang and W. Hu, *ACS Appl. Mater. Interfaces*, 2019, **11**, 27964-27972.
- 14 S. Prabhakaran, J. Balamurugan, N. H. Kim and J. H. Lee, *Small*, 2020, **16**, 2000797.
- 15 X. Duan, S. Ren, N. Pan, M. Zhang and H. Zheng, *J. Mater. Chem. A*, 2020, **8**, 9355-9363.
- 16 X. Duan, N. Pan, C. Sun, K. Zhang, X. Zhu, M. Zhang, L. Song and H. Zheng, *J. Energy Chem.*, **56**, 290-298.
